# Supplementary material for: Observational study of long-term persistent elevation of neurodegeneration markers after cardiac surgery
Source: PubMed Central journal article supplement (PMC6509119; doi:10.1038/s41598-019-42351-2), 2019-05-09
Supplement: 41598_2019_42351_MOESM1_ESM.pdf [file 41598_2019_42351_MOESM1_ESM.pdf]

# Observational study of long-term persistent elevation of neurodegeneration markers after cardiac surgery.

Matthew DiMeglio MBA<sup>1,4</sup>, William Furey MBA<sup>1,4</sup>, Jihane Hajj CRNP<sup>2</sup>, Jordan Lindekens BSN<sup>3</sup>, Saumil Patel MD<sup>4</sup>, Michael Acker MD<sup>5</sup>, Joseph Bavaria MD<sup>5</sup>, Wilson Y Szeto MD<sup>5</sup>, Pavan Atluri MD<sup>5</sup>, Margalit Haber PhD<sup>6</sup>, Ramon Diaz-Arrastia MD, PhD<sup>6</sup>, Krzysztof Laudanski MD, PhD, MA, FCCM<sup>4\*</sup>

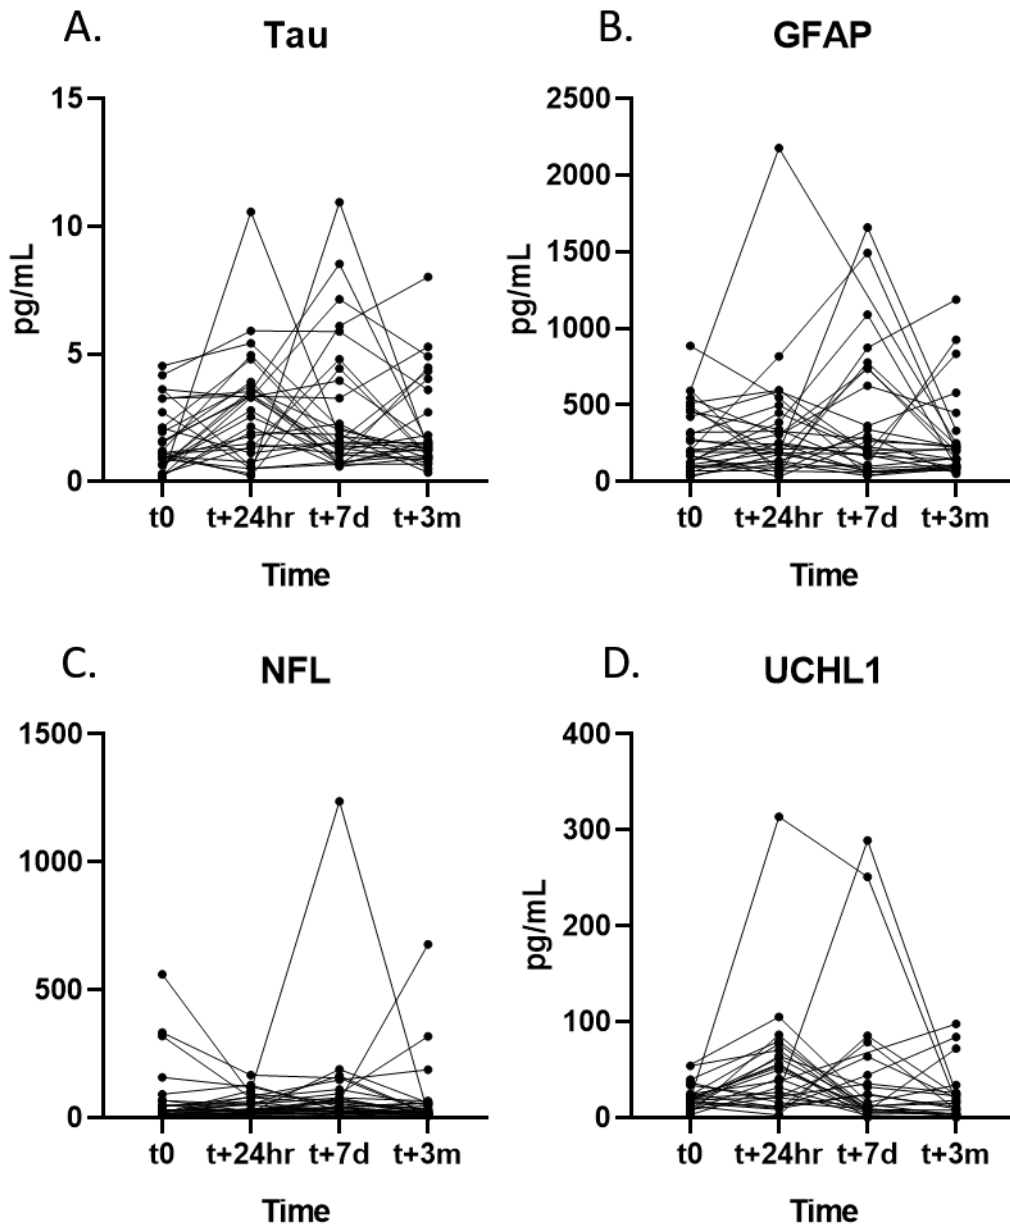

Supplemental Figure 1. Spaghetti plot of biomarker values for each patient at all time points.
